# Supplementary material
Source: publisher site journal article supplement (https://zse.pensoft.net/article/61351/download/suppl/36/)
Supplement: Supplementary file 1

## Sheet: Sheet1
Character	Shapiro_W	Shapiro_p	Levene_F	Levene_p	KW_chi-squared	KW_p	ANOVA_F	ANOVA_p	df
G	0.95389	0.001839**	2.4808	0.03739	3.7675	0.5834	NA	NA	5
Su	0.56256	< 0.001***	1.5751	0.175	3.1207	0.6814	NA	NA	5
IF	0.74376	< 0.001***	1.1925	0.3191	5.886	0.3175	NA	NA	5
Gu	0.9838	0.2782	1.8392	0.113	NA	NA	2.134	0.0684	5
SuL	0.95704	0.004381**	1.6718	0.1502	11.603	0.04065*	NA	NA	5
Fe	0.93945	< 0.001***	0.3316	0.8927	24.992	< 0.001***	NA	NA	5
